# Supplementary material for: Functionalized carbonaceous fibers for high performance flexible all-solid-state asymmetric supercapacitors
Source: Royal Society of Chemistry journal article supplement (doi:10.1039/c5ta01990g), 2015-01-01
Supplement: c5ta01990g2.pdf [file c5ta01990g2.pdf]

## Electronic Supporting Information

### Functionalized carbonaceous fibers for high performance flexible all-solid-state asymmetric supercapacitors

Zheyue Zhang, Fei Xiao, Jian Xiao, Shuai Wang\*

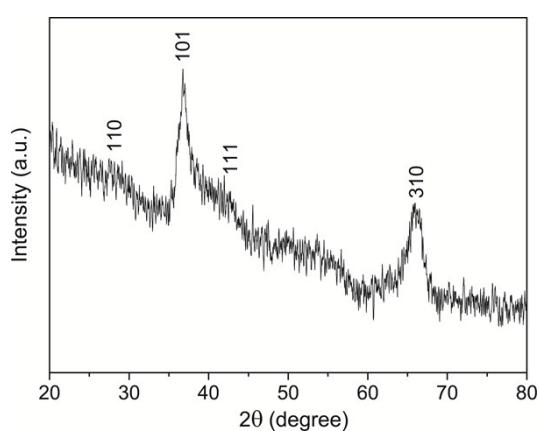

**Fig. S1** XRD pattern of CF@RGO@MnO<sub>2</sub>.

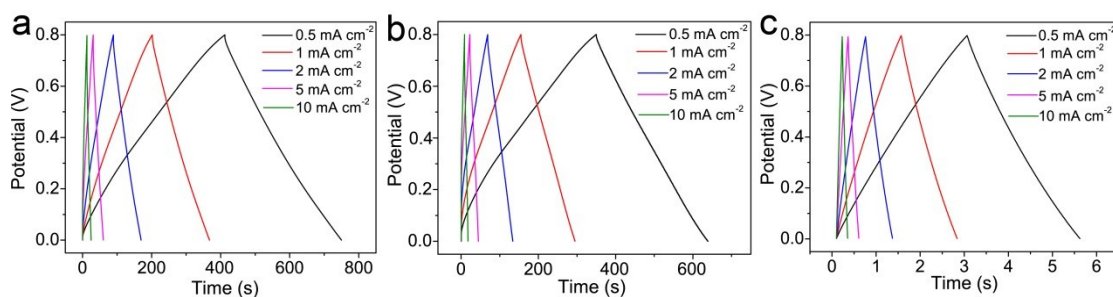

**Fig. S2** Galvanostatic charge/discharge curves of (a) CF@RGO@MnO<sub>2</sub>, (b) CF@MnO<sub>2</sub> and (c) CF@RGO electrodes at different current densities.

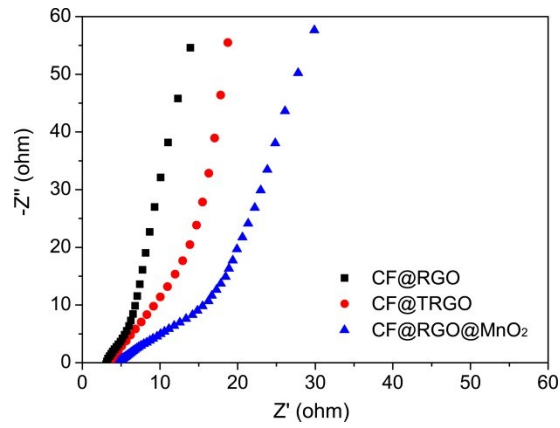

**Fig. S3** Nyquist plots of CF@RGO, CF@TRGO and CF@RGO@MnO<sub>2</sub>.

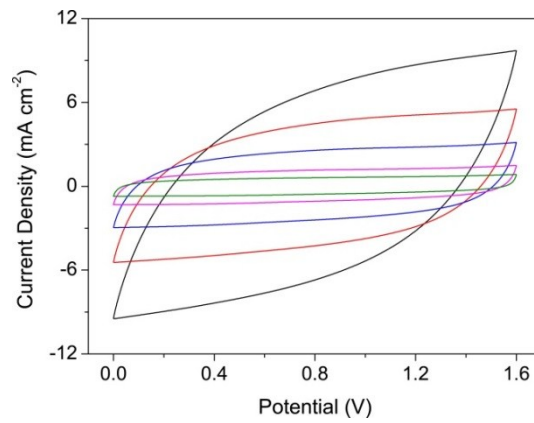

**Fig. S4** The CV curves of the asymmetric supercapacitor at different scan rates (10, 20, 50, 100 and 200 mV s<sup>-1</sup>).

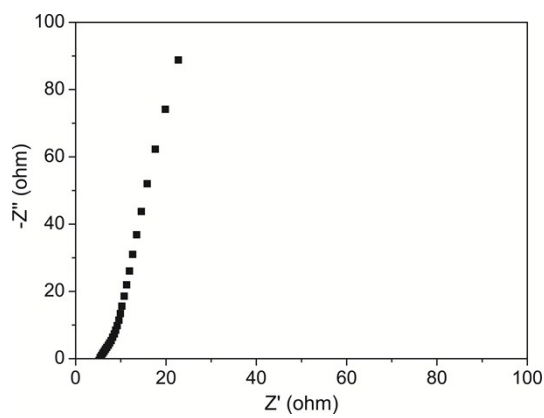

**Fig. S5** Nyquist plots of the fabricated asymmetric supercapacitor.
